# Supplementary material for: Machine learning model for diagnosing salivary gland adenoid cystic carcinoma based on clinical and ultrasound features
Source: Springer Nature journal article supplement (doi:10.1186/s13244-025-01974-y), 2025-05-08
Supplement: MOESM1 [file 13244_2025_1974_MOESM1_ESM.pdf]

**Machine learning model for diagnosing salivary gland  
adenoid cystic carcinoma based on clinical and ultrasound  
features**

**ELECTRONIC SUPPLEMENTARY MATERIAL**

**Supplementary Table 1** Hyperparameter settings of the different prediction models.

|         | Hyperparameter settings                                                                                     |
|---------|-------------------------------------------------------------------------------------------------------------|
| LR      | 'C': 10, 'penalty': 'l1'                                                                                    |
| SVM     | 'C': 0.1, 'gamma': 'scale', 'kernel': 'linear'                                                              |
| DT      | 'criterion': 'gini', 'max_depth': None, 'min_samples_leaf': 1,<br>'min_samples_split': 2                    |
| RF      | 'bootstrap': False, 'max_depth': 20, 'min_samples_leaf': 1,<br>'min_samples_split': 10, 'n_estimators': 300 |
| XGBoost | 'colsample_bytree': 0.9, 'learning_rate': 0.2, 'max_depth': 3,<br>'n_estimators': 100, 'subsample': 0.9     |

Note: LR, logistic regression; SVM, support vector machine; DT, decision tree; RF, random forest; XGBoost, extreme gradient boosting.

**Supplementary Table 2** Interobserver variability of US features.

| Characteristics | Kappa | 95% CI        | P value  |
|-----------------|-------|---------------|----------|
| Border          | 0.811 | 0.732 - 0.889 | < 0.001* |
| Shape           | 0.841 | 0.787 - 0.896 | < 0.001* |
| Heterogeneity   | 0.794 | 0.733 - 0.855 | < 0.001* |
| Echo            | 0.793 | 0.613 - 0.973 | < 0.001* |
| Cystic areas    | 0.905 | 0.862 - 0.948 | < 0.001* |
| Calcification   | 0.908 | 0.828 - 0.988 | < 0.001* |
| Vascularity     | 0.778 | 0.713 - 0.843 | < 0.001* |
| Rat tail sign   | 0.871 | 0.782 - 0.959 | < 0.001* |
| Polar vessel    | 0.860 | 0.778 - 0.942 | < 0.001* |

Note: US, ultrasound; CI, confidence interval. \*Statistically significant at  $P < 0.05$ .

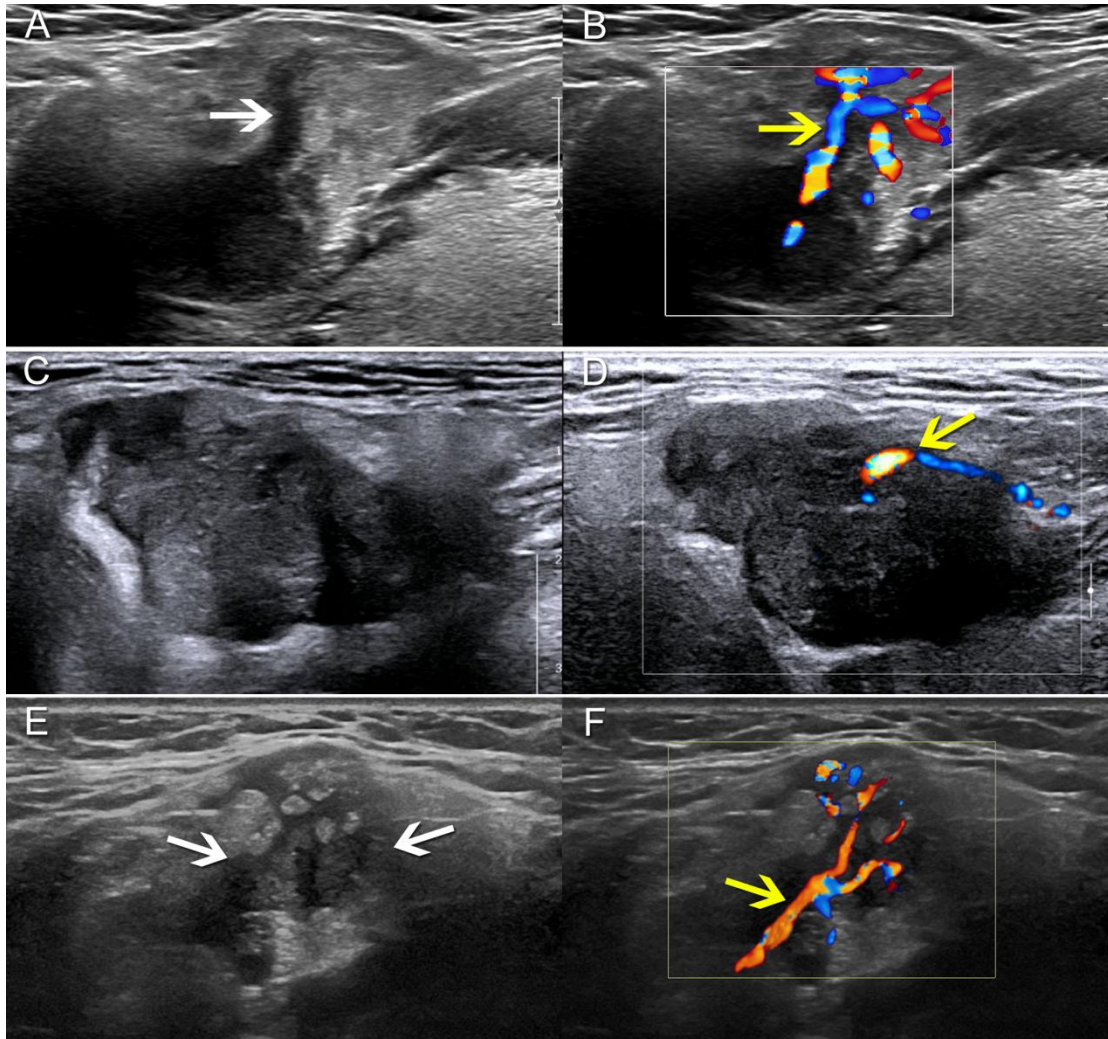

**Supplementary Figure 1** US images of ACC in the salivary glands. **(A, B)** Case 1: a 35-year-old female with ACC in the right submandibular gland. **(A)** US image showed a 2.6 cm × 1.9 cm × 2.5 cm irregular nodule with a unclear border, absence of cystic areas, and presence of rat tail sign (white arrow). **(B)** CDFI showed a polar vessel (yellow arrow) as a dominant vessel without branches penetrating the nodule. **(C, D)** Case 2: a 66-year-old female with ACC in the right submandibular gland. **(C)** US image showed a 4.1 cm × 2.2 cm × 3.7 cm irregular nodule with a unclear border and absence of cystic areas. **(D)** CDFI showed a polar vessel (yellow arrow) as a dominant vessel without branches penetrating the nodule. **(E, F)** Case 3: a 57-year-old male with ACC in the right submandibular gland. **(E)** US image showed a 2.3 cm × 1.5 cm × 1.7 cm irregular nodule (white arrow) with a unclear border and absence of cystic areas. **(F)** CDFI showed a polar vessel (yellow arrow) as a dominant vessel with branches penetrating the nodule. Note: US, ultrasound; ACC, adenoid cystic carcinoma; CDFI, color Doppler flow imaging.

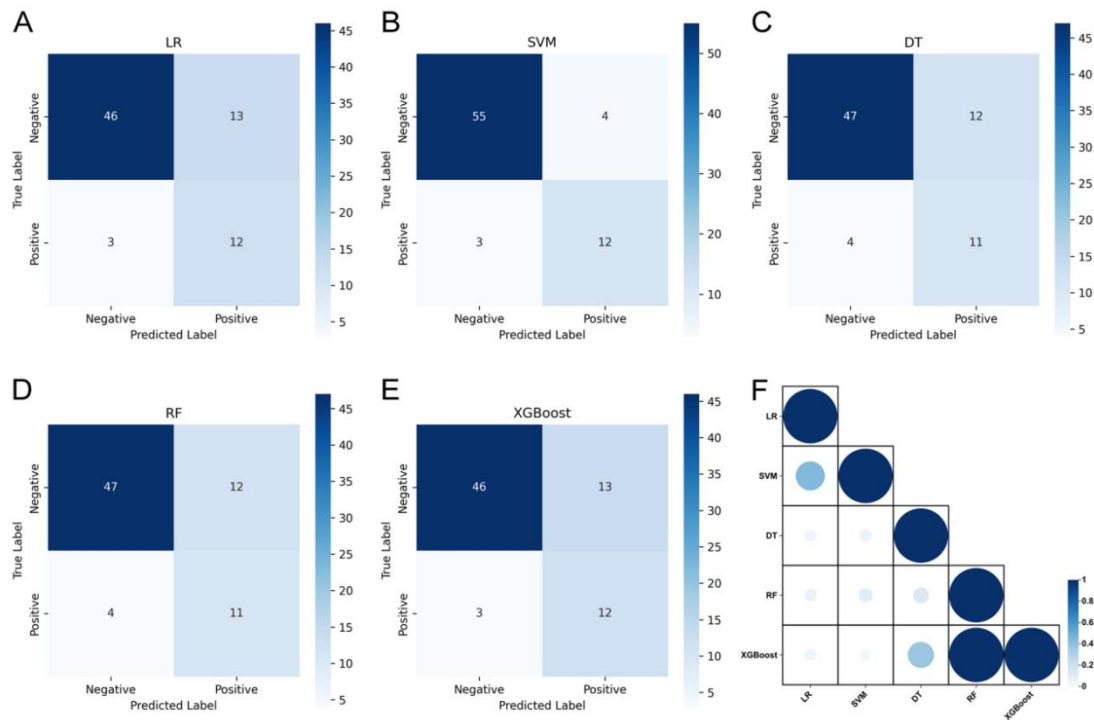

**Supplementary Figure 2** Analysis of five ML models in the internal validation cohort: confusion matrices and AUC comparisons. **(A)** LR model. **(B)** SVM model. **(C)** DT model. **(D)** RF model. **(E)** XGBoost model. **(F)** *P* values for the pairwise comparison of AUC between different models. Note: ML, machine learning; LR, logistic regression; SVM, support vector machine; DT, decision tree; RF, random forest; XGBoost, extreme gradient boosting; AUC, area under curve.

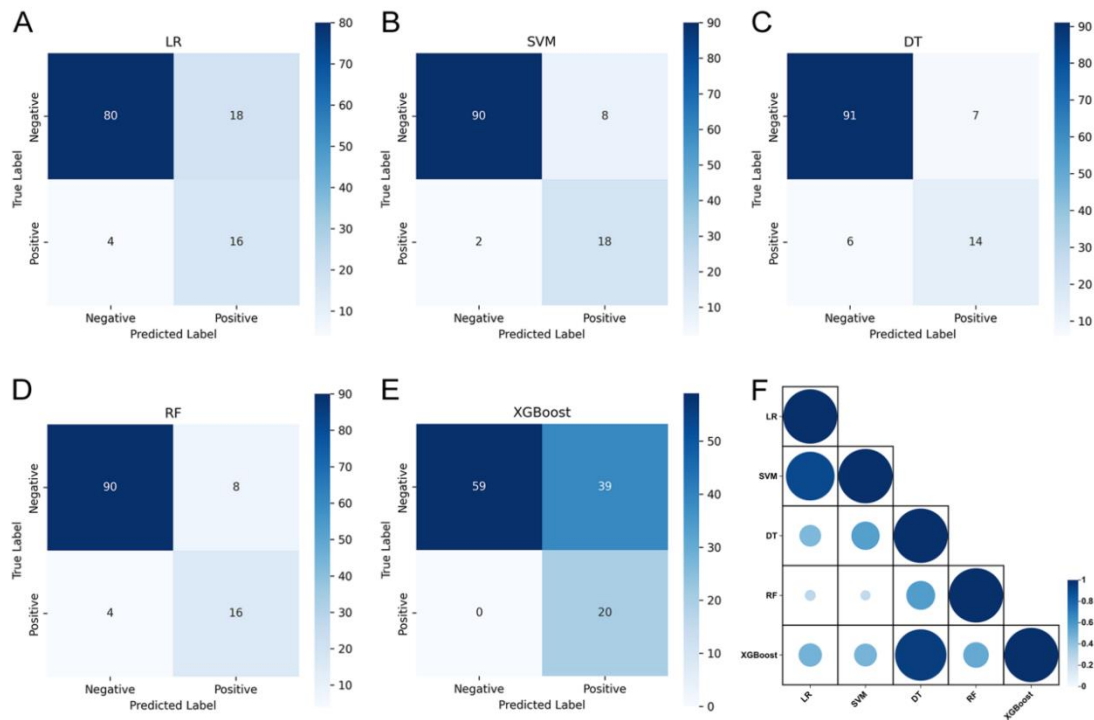

**Supplementary Figure 3** Analysis of five ML models in the external validation cohort: confusion matrices and AUC comparisons. **(A)** LR model. **(B)** SVM model. **(C)** DT model. **(D)** RF model. **(E)** XGBoost model. **(F)** *P* values for the pairwise comparison of AUC between different models. Note: ML, machine learning; LR, logistic regression; SVM, support vector machine; DT, decision tree; RF, random forest; XGBoost, extreme gradient boosting; AUC, area under curve.

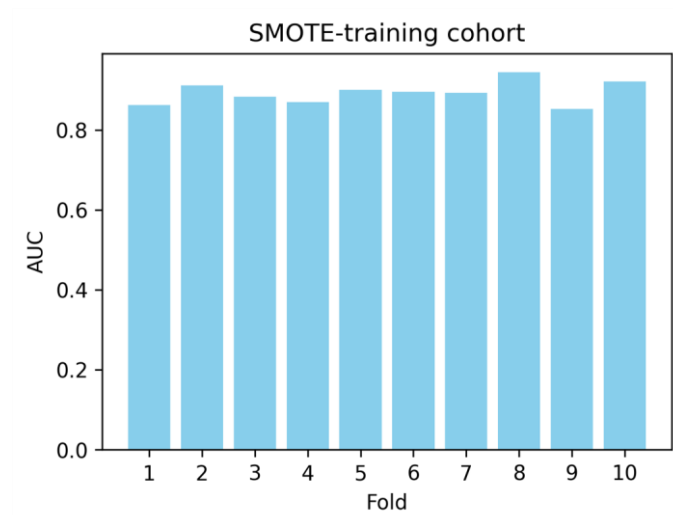

**Supplementary Figure 4** The AUCs of 10-fold cross-validation for SVM model in the SMOTE-training cohort. Note: AUC, area under curve; SVM, support vector machine; SMOTE, synthetic minority over-sampling technique.
